# Supplementary material
Source: Research Square preprint supplement (doi:10.21203/rs.3.rs-10035715/v1)
Supplement: Supplementary file 1 [file 034e40ea799ee6d97d671f7e.docx]

Table S1. Summary of the emergence of *Culicoides* species from the tree holes sampled.

| Tree family | Tree scientific name | Tree common name | Total trees sampled (*n*) | Trees with midges  (*n*) | Midge species emerged (*n*) | Total midges emerged  (*n*) | Midges emerged per tree*  (mean ± SE) |
| --- | --- | --- | --- | --- | --- | --- | --- |
| Altingiaceae | *Liquidambar styraciflua* | Sweetgum | 11 | 7 | 5 | 70 | 6.4 ± 4.5 |
| Fagaceae | *Quercus nigra* | Water Oak | 11 | 4 | 4 | 42 | 3.8 ± 2.0 |
| Ulmaceae | *Ulmus alata* | Winged elm | 3 | 0 | 0 | 0 | 0.0 ± 0.0 |
| Oleaceae | *Ligustrum sinense* | Chinese Privet | 2 | 2 | 2 | 9 | 4.5 ± 3.5 |
| Ulmaceae | *Ulmus americana* | American Elm | 1 | 1 | 3 | 12 | 12.0 ± 0.0 |
| Juglandaceae | *Carya illinoinensis* | Pecan | 1 | 0 | 0 | 0 | 0.0 ± 0.0 |
| Rosaceae | *Prunus serotina* | Black cherry | 1 | 0 | 0 | 0 | 0.0 ± 0.0 |
| Fagaceae | *Quercus falcata* | Cherrybark oak | 1 | 0 | 0 | 0 | 0.0 ± 0.0 |
| Pinaceae | *Pinus taeda* | Loblolly pine | 1 | 0 | 0 | 0 | 0.0 ± 0.0 |
| Betulaceae | *Carpinus caroliniana* | Ironwood | 1 | 0 | 0 | 0 | 0.0 ± 0.0 |

*Calculated as total number of midges emerged/total number of trees sampled.

Table S2. Co-occurrence of *Culicoides* species (*n*) in different tree holes at Bob R. Jones Idlewild Research Station, East Feliciana parish, Louisiana, USA.

| Treehole id | Tree species | *C. hinmani* | | | *C. guttipennis* | | *C. arboricola* | | *C. nanus* | | *C. debilipalpis* | | *C. paraensis* | | *C. beckae* | | Total | |
| --- | --- | --- | --- | --- | --- | --- | --- | --- | --- | --- | --- | --- | --- | --- | --- | --- | --- | --- |
| 1 | Sweetgum | | 49 | 0 | | 0 | | 0 | | 1 | | 0 | | 0 | | 50 | |
| 23 | Sweetgum | | 4 | 1 | | 2 | | 0 | | 0 | | 2 | | 0 | | 9 | |
| 32 | Sweetgum | | 0 | 0 | | 1 | | 0 | | 3 | | 2 | | 0 | | 6 | |
| 31 | Sweetgum | | 0 | 0 | | 2 | | 0 | | 0 | | 0 | | 0 | | 2 | |
| 9 | Sweetgum | | 0 | 1 | | 0 | | 0 | | 0 | | 0 | | 0 | | 1 | |
| 13 | Sweetgum | | 0 | 1 | | 0 | | 0 | | 0 | | 0 | | 0 | | 1 | |
| 29 | Sweetgum | | 0 | 1 | | 0 | | 0 | | 0 | | 0 | | 0 | | 1 | |
| 19 | Water Oak | | 0 | 13 | | 6 | | 0 | | 0 | | 0 | | 0 | | 19 | |
| 22 | Water Oak | | 5 | 0 | | 7 | | 0 | | 0 | | 0 | | 0 | | 12 | |
| 11 | Water Oak | | 0 | 4 | | 5 | | 0 | | 0 | | 0 | | 0 | | 9 | |
| 4 | Water Oak | | 0 | 0 | | 1 | | 0 | | 0 | | 0 | | 1 | | 2 | |
| 21 | Chinese Privet | | 0 | 8 | | 0 | | 0 | | 0 | | 0 | | 0 | | 8 | |
| 33 | Chinese Privet | | 0 | 0 | | 0 | | 0 | | 0 | | 1 | | 0 | | 1 | |
| 5 | American Elm | | 1 | 1 | | 0 | | 10 | | 0 | | 0 | | 0 | | 12 | |
|  | Total | | 59 | 30 | | 24 | | 10 | | 4 | | 5 | | 1 | | 133 | |

Table S3. Model averaging summary of individual *Culicoides* species.

| Species | Full model | Total models generated  (*n*) | Models ranked delta AICc < 2 (*n*) |
| --- | --- | --- | --- |
| *C. hinmani* | glm(*C.hinmani* ~ standing.water.present + moss.present + area.of.treehole.opening + height.from.ground + distance.to.water, data = data.log, family = “poisson”) | 32 | 3 |
|  |  |  |  |
| *C. guttipennis* | glm(*C.guttipennis* ~ standing.water.present + moss.present + area.of.treehole.opening + height.from.ground + distance.to.water, data = data.log, family = “poisson”) | 32 | 4 |
|  |  |  |  |
| *C. arboricola* | glm(*C.arboricola* ~ standing.water.present + moss.present + area.of.treehole.opening + height.from.ground + distance.to.water, data = data.log, family = “poisson”) | 32 | 2 |
|  |  |  |  |
| *C. nanus* | glm(*C.nanus* ~ standing.water.present + moss.present + height.from.ground, data = data.log, family = “poisson”, method = “brglm_fit”) | 8 | 7 |
|  |  |  |  |
| *C. paraensis* | glm(*C.paraensis* ~ standing.water.present + moss.present + area.of.treehole.opening + height.from.ground + distance.to.water, data = data.log, family = "poisson", method = “brglm_fit”) | 32 | 4 |
|  |  |  |  |
| *C. debilipalpis* | glm(*C.debilipalpis* ~ standing.water.present + moss.present + area.of.treehole.opening + height.from.ground + distance.to.water, data = data.log, family = "poisson", method = “brglm_fit”) | 32 | 5 |
|  |  |  |  |
| *C. beckae* | glm(*C.beckae* ~ standing.water.present + moss.present + area.of.treehole.opening + height.from.ground + distance.to.water, data = data.log, family = "poisson", method = “brglm_fit”) | 32 | 4 |


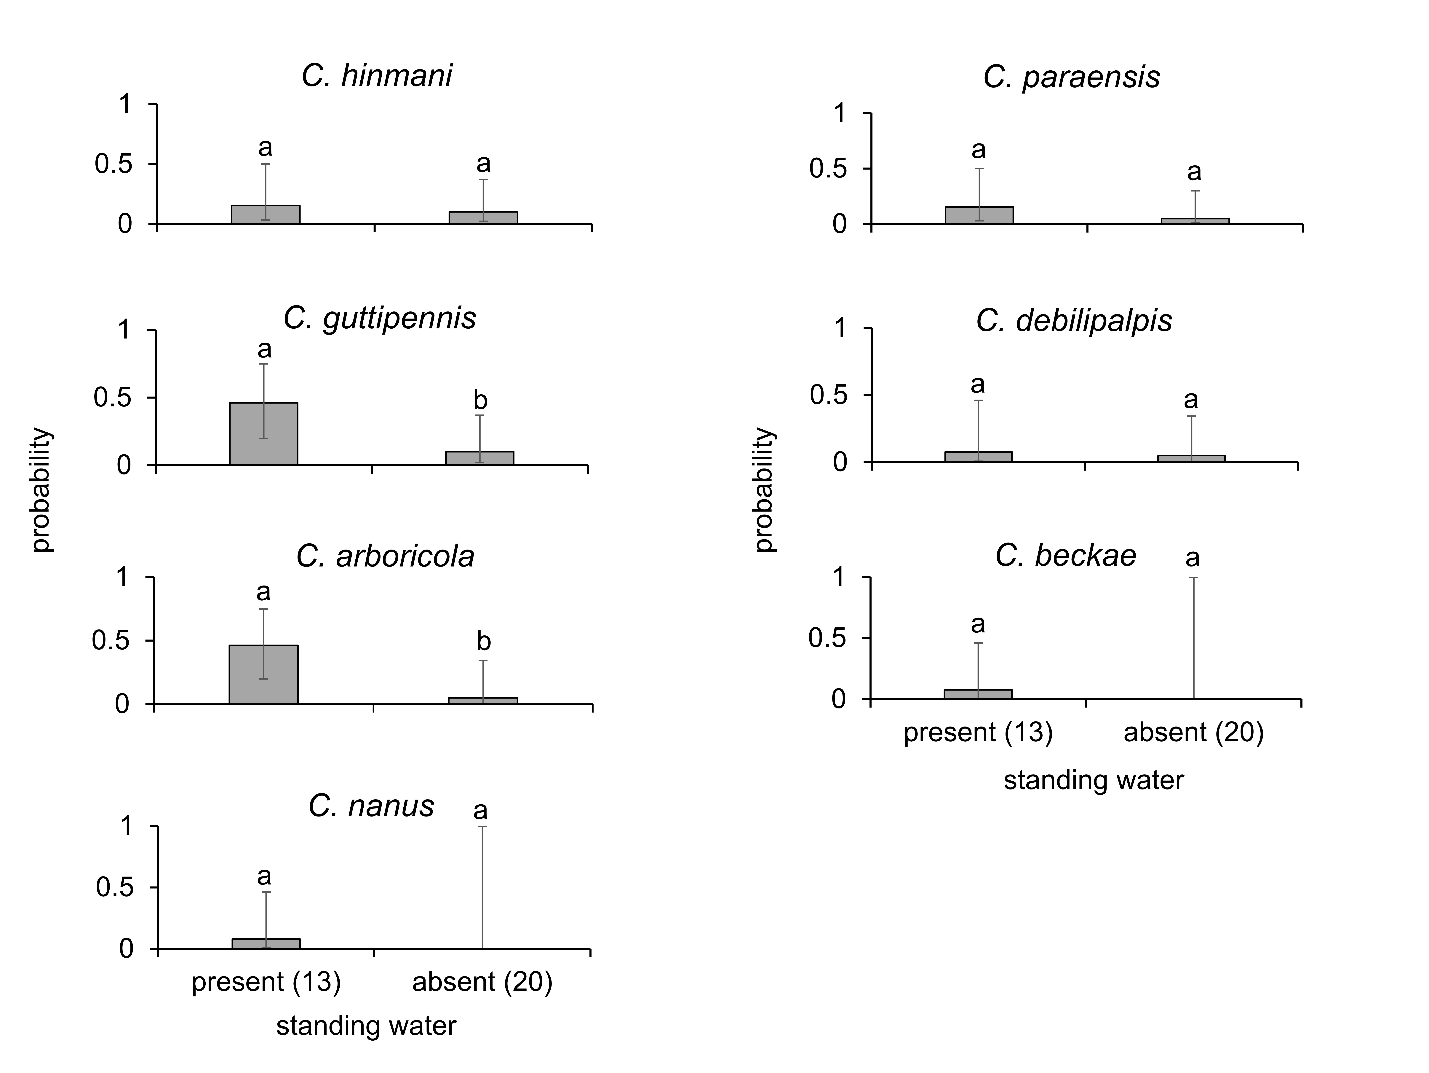


Fig. S1. The effect of standing water on the presence of individual *Culicoides* species. Values in parentheses along x-axis represent the number of tree holes sampled.


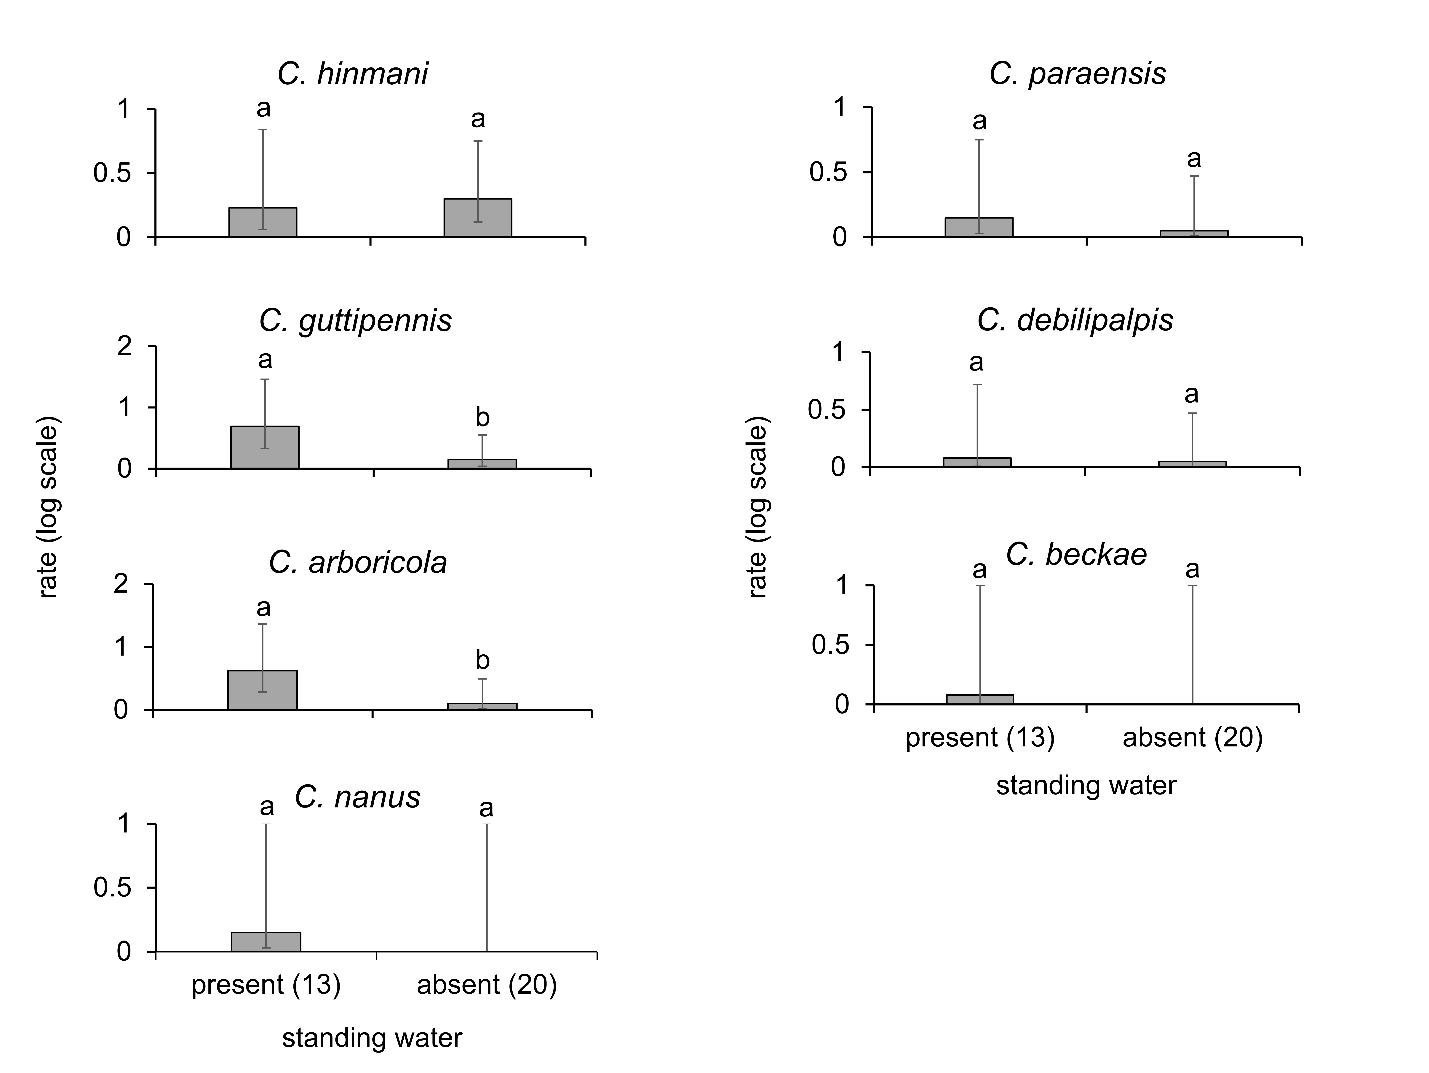


Fig. S2. The effect of standing water on the abundance of individual *Culicoides* species. Values in parentheses along x-axis represent the number of tree holes sampled.


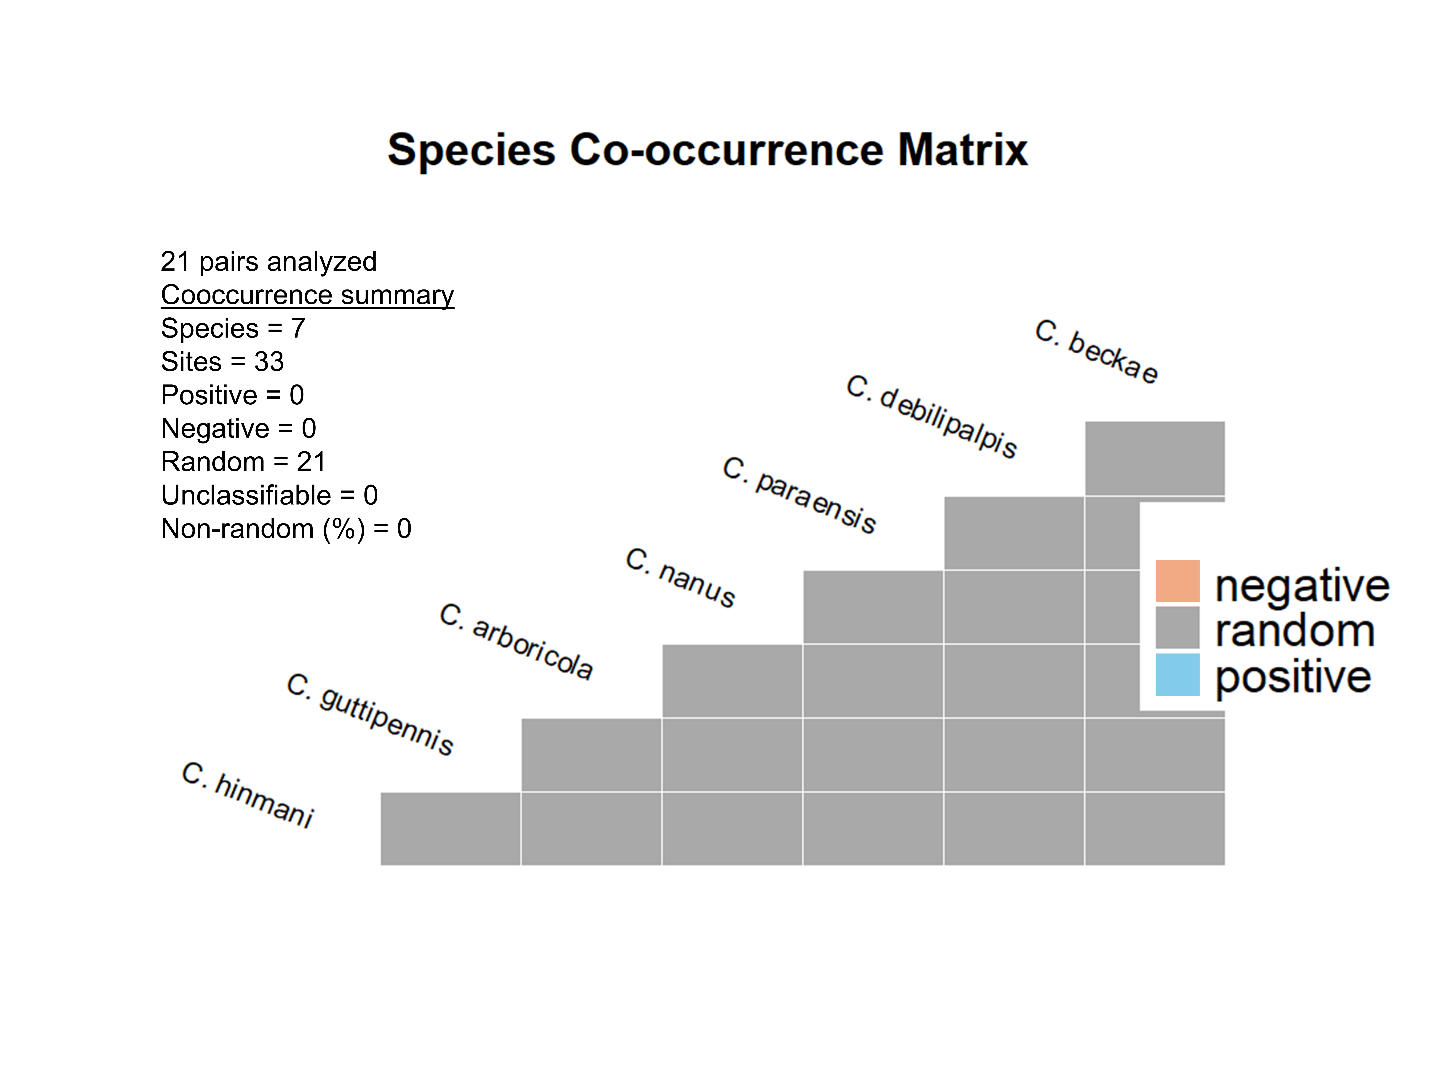


Fig. S3. The co-occurrence matrix of *Culicoides* species in the tree holes sampled.
